# Supplementary material
Source: HighWire-hosted journal article supplement (https://erj.ersjournals.com/content/46/1/165)
Supplement: inline-supplementary-material-1 [file inline-supplementary-material-1.pdf]

## **Supplementary material**

### **Decreasing cost effectiveness of testing for latent TB in HIV in a low TB incidence area.**

**Authors:** S Capocci (1,7), C Smith (2), S Morris (3), S Bhagani (4), I Cropley (4), I Abubakar (5,6), M Johnson (1), M Lipman (1,7)

#### **Affiliations and addresses:**

1. Department of HIV and Thoracic Medicine, Royal Free London NHS Foundation Trust, Pond Street, London, NW3 2QG, United Kingdom
2. Research Department of Infection and Population Health, University College London, Royal Free Campus, Rowland Hill Street, London, NW3 2PF, United Kingdom
3. Department of Applied Health Research, University College London, 1-19 Torrington Place, London, WC1E 7HB, United Kingdom
4. Department of Infectious Diseases, Royal Free London NHS Foundation Trust, Pond Street, London, NW3 2QG, United Kingdom
5. Research Department of Infection and Population Health, University College London, 4th Floor, Mortimer Market Centre, London WC1E 6JB, United Kingdom
6. Medical Research Council Clinical Trials Unit, Aviation House, 125 Kingsway, London, WC2B 6NH, United Kingdom
7. Division of Medicine, University College London, Royal Free Campus, Rowland Hill Street, London NW3 2PF, United Kingdom

#### **Corresponding Author:**

Santino Capocci, Department of Thoracic Medicine, Royal Free London NHS Foundation Trust, Pond Street, London, NW3 2QG

Tel: 020 7794 0500 ext 31146

Fax: 020 7317 7561

Email: santino.capocci@nhs.net

## Appendix A: Table 1

### Variables for univariate and probabilistic sensitivity analyses

| Variable                                                                     | Baseline variable | Range for univariate sensitivity analysis | Distribution for Probabilistic Sensitivity Analysis | Alpha | Beta   | Source               |
|------------------------------------------------------------------------------|-------------------|-------------------------------------------|-----------------------------------------------------|-------|--------|----------------------|
| Cost IGRA (based on T.Spot.TB test)                                          | €72               | €27.60 - €108.00                          | Gamma                                               | 10.10 | 7.127  | [1,2], local charges |
| Cost TST                                                                     | €19.37            | €9.68 - €38.74                            | Gamma                                               | 15.35 | 1.262  | [1]                  |
| Cost 6 months isoniazid                                                      | €943.80           | €449.40 - €1,579.80                       | Gamma                                               | 13.99 | 67.42  | [1,3], local charges |
| Cost treatment for active TB                                                 | €9,143.60         | €4,571.81 - €18,287.2                     | Gamma                                               | 15.37 | 595.0  | [4]                  |
| QALY reduction for active TB                                                 | 0.676             | 0.271 to 6.72                             | Gamma                                               | 16.72 | 0.0404 | [1,5,6]              |
| QALY reduction for latent TB                                                 | 0.007             | 0.001 to 0.1                              | Gamma                                               | 7.530 | 0.0009 | [1]                  |
| Sensitivity of IGRA                                                          | 91%               | 70%-100%                                  | Beta                                                | 710.8 | 71.16  | [7]                  |
| Uptake testing                                                               | 87%               | 87%-100%                                  | Beta                                                | 519.1 | 79.87  | [8]                  |
| Uptake LTBI treatment                                                        | 87%               | 60%-100%                                  | Beta                                                | 39.13 | 5.870  | [8]                  |
| Efficacy LTBI treatment                                                      | 62%               | 40%-100%                                  | Beta                                                | 1474  | 903.3  | [9]                  |
| Indeterminate IGRA rate                                                      | 3%                | 0%-10%                                    | Beta                                                | 20.03 | 569.0  | [10]                 |
| Proportion of black Africans with positive IGRA                              | 13%               |                                           | Beta                                                | 16.9  | 113.1  | [8]                  |
| Proportion of subjects from middle TB incidence countries with positive IGRA | 10%               |                                           | Beta                                                | 7.8   | 70.2   | [8]                  |
| Proportion of subjects from low TB incidence countries with positive IGRA    | 3%                |                                           | Beta                                                | 7.23  | 233.8  | [8]                  |

## Appendix A: Figure 1

### Model structure

\*IPT – Isoniazid Preventive Therapy or alternative treatment for LTBI

## **Appendix A: Figure 2**

Testing algorithms for: No testing, BHIVA strategy, NICE strategy, testing all clinic attendees with data between 2005-2010 [1,11]

## **Appendix B: Univariate and multivariate sensitivity analyses**

Univariate and multivariate sensitivity testing data with incremental cost-effectiveness ratio and cost/quality adjusted life year (QALY) gained. Efficacy of preventive treatment is 62% (unless specified) and QALY reductions are 0.676 for active TB and 0.007 for latent TB. Discounting at 3.5%.

**Table 1:** Incremental cost per case averted (ICCA) for: British HIV Association (BHIVA) strategy compared to No testing, National Institute for Health and Care Excellence (NICE) strategy compared to BHIVA strategy and testing all clinic attendees compared to NICE strategy.[1,11]

| Variable                                      | BHIVA to No testing |             | NICE to BHIVA |             | All to NICE |             |
|-----------------------------------------------|---------------------|-------------|---------------|-------------|-------------|-------------|
|                                               | 2000-2005           | 2005-2010   | 2000-2005     | 2005-2010   | 2000-2005   | 2005-2010   |
| Middle inputs                                 | €3,997              | €5,875      | €4,550        | €19,888     | €19,803     | €40,241     |
| TST €9.68                                     | €3,997              | €5,875      | €3,461        | €18,941     | €23,169     | €42,530     |
| TST €38.74                                    | €3,997              | €5,875      | €6,729        | €21,781     | €13,072     | €35,663     |
| IGRA €27.60                                   | Cost saving         | €994        | Cost saving   | €6,538      | €4,864      | €18,215     |
| IGRA €108.00                                  | €7,657              | €9,833      | €9,741        | €30,712     | €31,914     | €58,099     |
| LTBI €449.40                                  | €707                | €1,912      | €3,877        | €16,966     | €13,579     | €30,460     |
| LTBI €1579.80                                 | €8,229              | €10,973     | €5,417        | €23,647     | €27,808     | €52,822     |
| Active €4571.81                               | €8,799              | €10,678     | €9,198        | €24,504     | €24,588     | €45,025     |
| Active €18287.21                              | Cost saving         | Cost saving | Cost saving   | €10,656     | €10,230     | €30,672     |
| LTBI efficacy 0-4                             | €11,477             | €14,389     | €12,165       | €35,904     | €35,957     | €67,636     |
| LTBI efficacy 1                               | Cost saving         | Cost saving | Cost saving   | €8,822      | €8,640      | €21,313     |
| Uptake of testing 60%                         | €3,997              | €5,875      | €4,550        | €19,888     | €19,803     | €40,241     |
| Uptake of testing 100%                        | €3,997              | €5,875      | €4,550        | €19,888     | €19,803     | €40,241     |
| Uptake of LTBI treatment 60%                  | €10,107             | €12,830     | €2,608        | €18,797     | €27,662     | €54,231     |
| Uptake of LTBI treatment 100%                 | €2,223              | €3,856      | €5,114        | €20,205     | €17,520     | €36,179     |
| Sensitivity of IGRA 70%                       | €8,058              | €10,497     | €8,684        | €28,582     | €28,572     | €55,112     |
| Sensitivity of IGRA 100%                      | €2,759              | €4,467      | €3,290        | €17,238     | €17,129     | €35,708     |
| Indeterminate rate 10%                        | €4,464              | €6,380      | €5,213        | €21,270     | €21,349     | €42,521     |
| Indeterminate rate 0%                         | €3,756              | €5,615      | €4,209        | €19,176     | €19,006     | €39,067     |
| Least expensive testing, most expensive costs | Cost saving         | Cost saving | Cost saving   | Cost saving | Cost saving | Cost saving |
| Most expensive testing, least expensive costs | €59,942             | €68,979     | €35,162       | €86,684     | €108,736    | €197,671    |

## Appendix B Table 2

Incremental cost/QALY gained for: BHIVA strategy compared to No testing, NICE strategy compared to BHIVA strategy and all attendees with a single IGRA to NICE strategy.[1,11]

Negative costs imply the strategy is cost-saving compared to no testing/alternative strategy.

| Variable                                      | BHIVA to No testing |             | NICE to BHIVA |                    | All to NICE        |                    |
|-----------------------------------------------|---------------------|-------------|---------------|--------------------|--------------------|--------------------|
|                                               | 2000-2005           | 2005-2010   | 2000-2005     | 2005-2010          | 2000-2005          | 2005-2010          |
| Middle inputs                                 | €6,270              | €9,332      | €6,998        | €32,564            | €33,473            | €74,067            |
| TST €9.68                                     | €6,270              | €9,332      | €5,322        | €31,014            | €39,164            | €78,282            |
| TST €38.74                                    | €6,270              | €9,332      | €10,348       | €35,664            | €22,096            | €65,642            |
| IGRA €27.60                                   | Cost saving         | €1,580      | Cost saving   | €10,706            | €8,222             | €33,527            |
| IGRA €108.00                                  | €12,012             | €15,618     | €14,980       | €50,288            | €53,948            | €106,937           |
| LTBI €449.40                                  | €1,109              | €3,038      | €5,962        | €27,779            | €22,954            | €56,066            |
| LTBI €1579.80                                 | €12,909             | €17,430     | €8,331        | €38,720            | €47,005            | €97,224            |
| Active €4571.81                               | €13,803             | €16,960     | €14,145       | €40,123            | €41,562            | €82,874            |
| Active €18287.21                              | Cost saving         | Cost saving | Cost saving   | €17,448            | €17,294            | €56,455            |
| LTBI efficacy 0-4                             | €18,625             | €23,823     | €19,125       | €62,461            | €66,103            | €144,437           |
| LTBI efficacy 1                               | Cost saving         | Cost saving | Cost saving   | €13,882            | €13,836            | €35,812            |
| Uptake of testing 60%                         | €6,270              | €9,332      | €6,998        | €32,564            | €33,473            | €74,067            |
| Uptake of testing 100%                        | €6,270              | €9,332      | €6,998        | €32,564            | €33,473            | €74,067            |
| Uptake of LTBI treatment 60%                  | €15,856             | €20,379     | €4,011        | €30,778            | €46,759            | €99,817            |
| Uptake of LTBI treatment 100%                 | €3,487              | €6,125      | €7,865        | €33,083            | €29,616            | €66,592            |
| Sensitivity of IGRA 70%                       | €12,873             | €17,049     | €13,515       | €48,343            | €50,505            | €109,660           |
| Sensitivity of IGRA 100%                      | €4,304              | €7,047      | €5,042        | €27,954            | €28,574            | €64,256            |
| Indeterminate rate 10%                        | €7,003              | €10,135     | €8,017        | €34,827            | €36,087            | €78,263            |
| Indeterminate rate 0%                         | €5,892              | €8,919      | €6,473        | €31,399            | €32,126            | €71,906            |
| QALY loss active TB 0.271                     | €17,194             | €26,164     | €18,555       | €96,673            | €106,128           | €290,964           |
| QALY loss active TB 6.72                      | Cost saving         | Cost saving | Cost saving   | Cost saving        | Cost saving        | Cost saving        |
| QALY loss latent TB 0.001                     | €5,961              | €8,777      | €6,768        | €29,832            | €29,825            | €61,245            |
| QALY loss latent TB 0.1                       | €31,931             | €471,668    | €14,774       | Strictly dominated | Strictly dominated | Strictly dominated |
| Least expensive testing, most expensive costs | Cost saving         | Cost saving | Cost saving   | Cost saving        | Cost saving        | Cost saving        |

| Variable                                      | BHIVA to No testing |           | NICE to BHIVA |           | All to NICE |           |
|-----------------------------------------------|---------------------|-----------|---------------|-----------|-------------|-----------|
|                                               | 2000-2005           | 2005-2010 | 2000-2005     | 2005-2010 | 2000-2005   | 2005-2010 |
| Most expensive testing, least expensive costs | €100,171            | €118,417  | €56,336       | €159,166  | €215,794    | €487,906  |

Note: BHIVA – British HIV Association, IGRA – Interferon Gamma Release Assay, LTBI – Latent Tuberculosis Infection, NICE – National Institute for Health and Care Excellence, QALY – Quality of Life Years, TST – Tuberculin Skin Test.

## REFERENCES

1. NICE. Tuberculosis - clinical diagnosis and management of tuberculosis, and measures for its prevention and control. NICE Clinical Guideline 117 2011.
2. NICE. Tuberculosis: Clinical diagnosis and management of tuberculosis, and measures for its prevention and control. Costing report. Clinical Guideline 33 2006.
3. Joint Formulary Committee. British national formulary. 62 ed. London: BMJ Group and Pharmaceutical Press; 2011.
4. Pooran A, Booth H, Miller RF, et al. Different screening strategies (single or dual) for the diagnosis of suspected latent tuberculosis: A cost effectiveness analysis. BMC Pulm Med 2010;10:7.
5. World Health Organization. Global Burden of Disease: 2004 Update . Geneva , World Health Organisation, 2008.
6. Pasipanodya JG, McNabb SJ, Hilsenrath P, et al. Pulmonary impairment after tuberculosis and its contribution to TB burden. BMC Public Health 2010;10:259.
7. Aichelburg MC, Rieger A, Breitenacker F, et al. Detection and prediction of active tuberculosis disease by a whole-blood interferon-gamma release assay in HIV-1-infected individuals. Clin Infect Dis 2009;48(7):954-62.
8. Kall MM, Coyne KM, Garrett NJ, et al. Latent and subclinical tuberculosis in HIV infected patients: A cross-sectional study. BMC Infect Dis 2012;12::107.
9. Akolo C, Adetifa I, Shepperd S, Volmink J. Treatment of latent tuberculosis infection in HIV infected persons. Cochrane Database Syst Rev 2010(1):CD000171.

10. Brock I, Ruhwald M, Lundgren B, et al. Latent tuberculosis in HIV positive, diagnosed by the M. tuberculosis specific interferon-gamma test. *Respir Res* 2006;7:56.
11. Pozniak AL, Coyne KM, Miller RF, et al. British HIV Association guidelines for the treatment of TB/HIV coinfection 2011. *HIV Med* 2011;12(9):517-24.

Appendix A, Figure 1  
Model structure

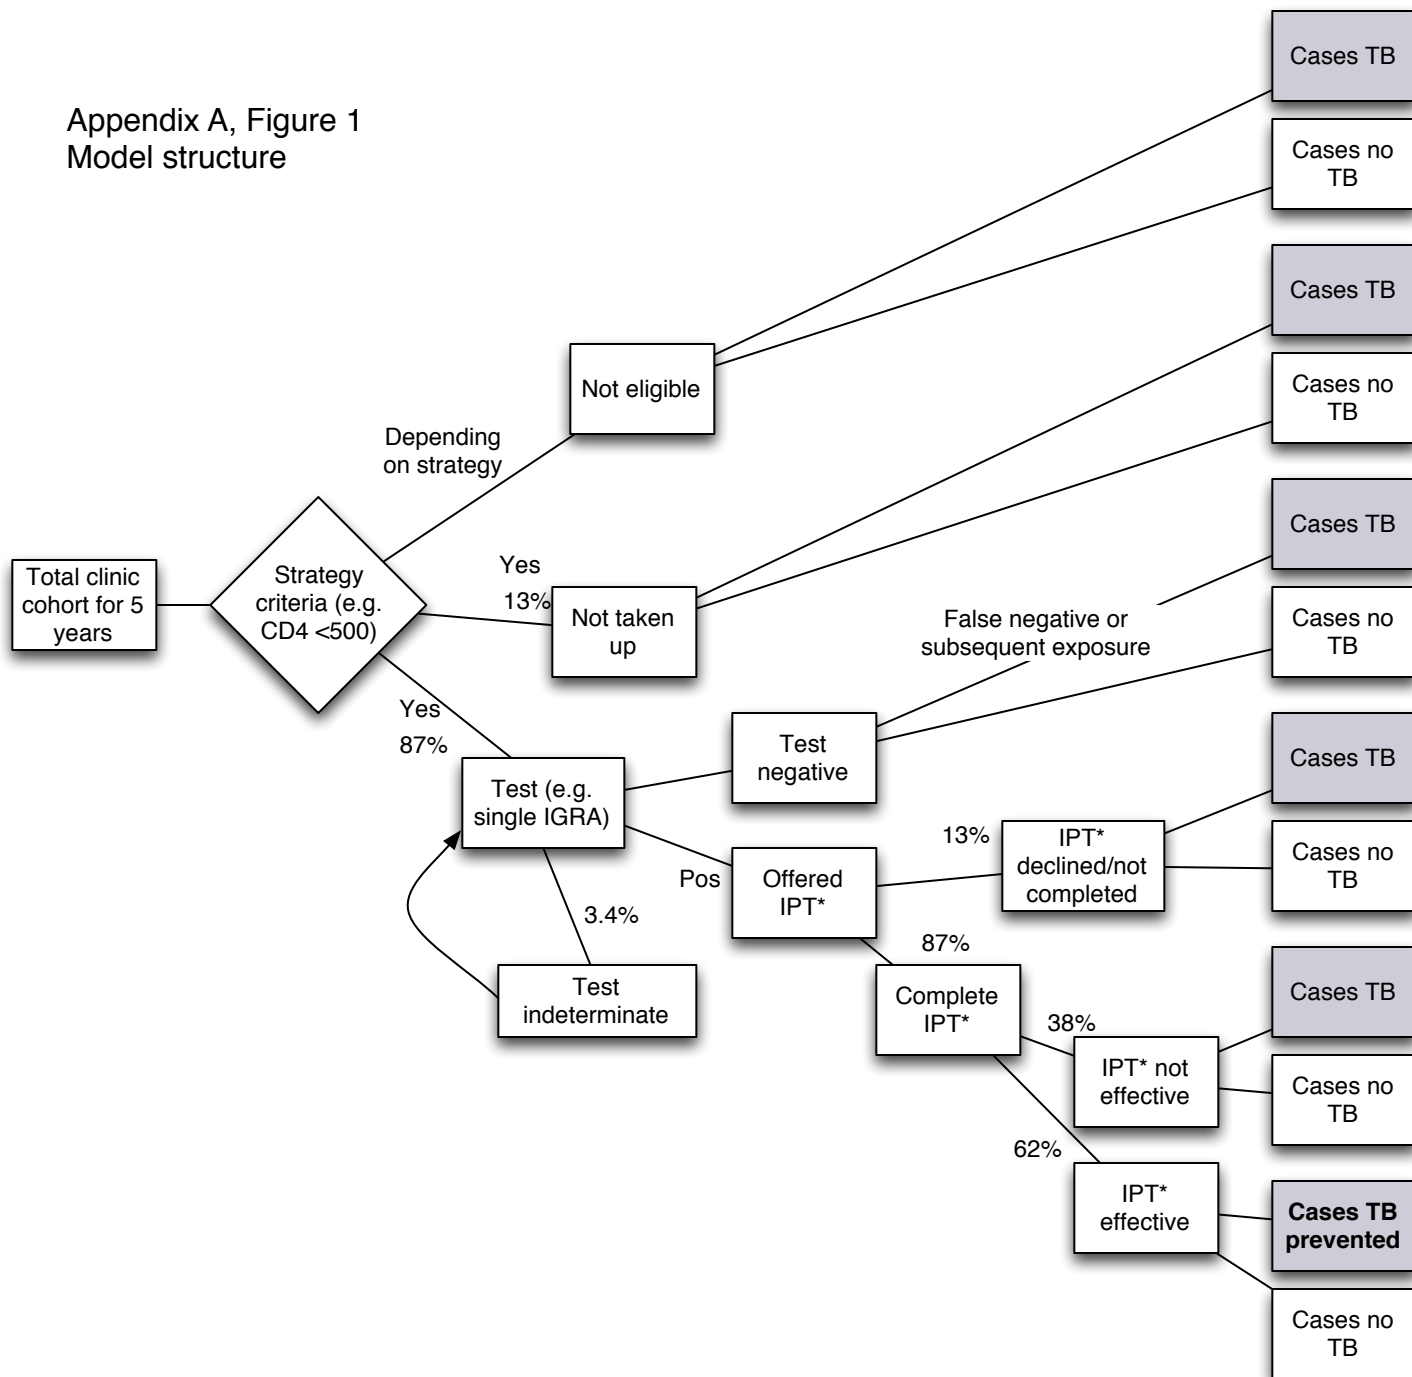



Appendix A, Figure 2

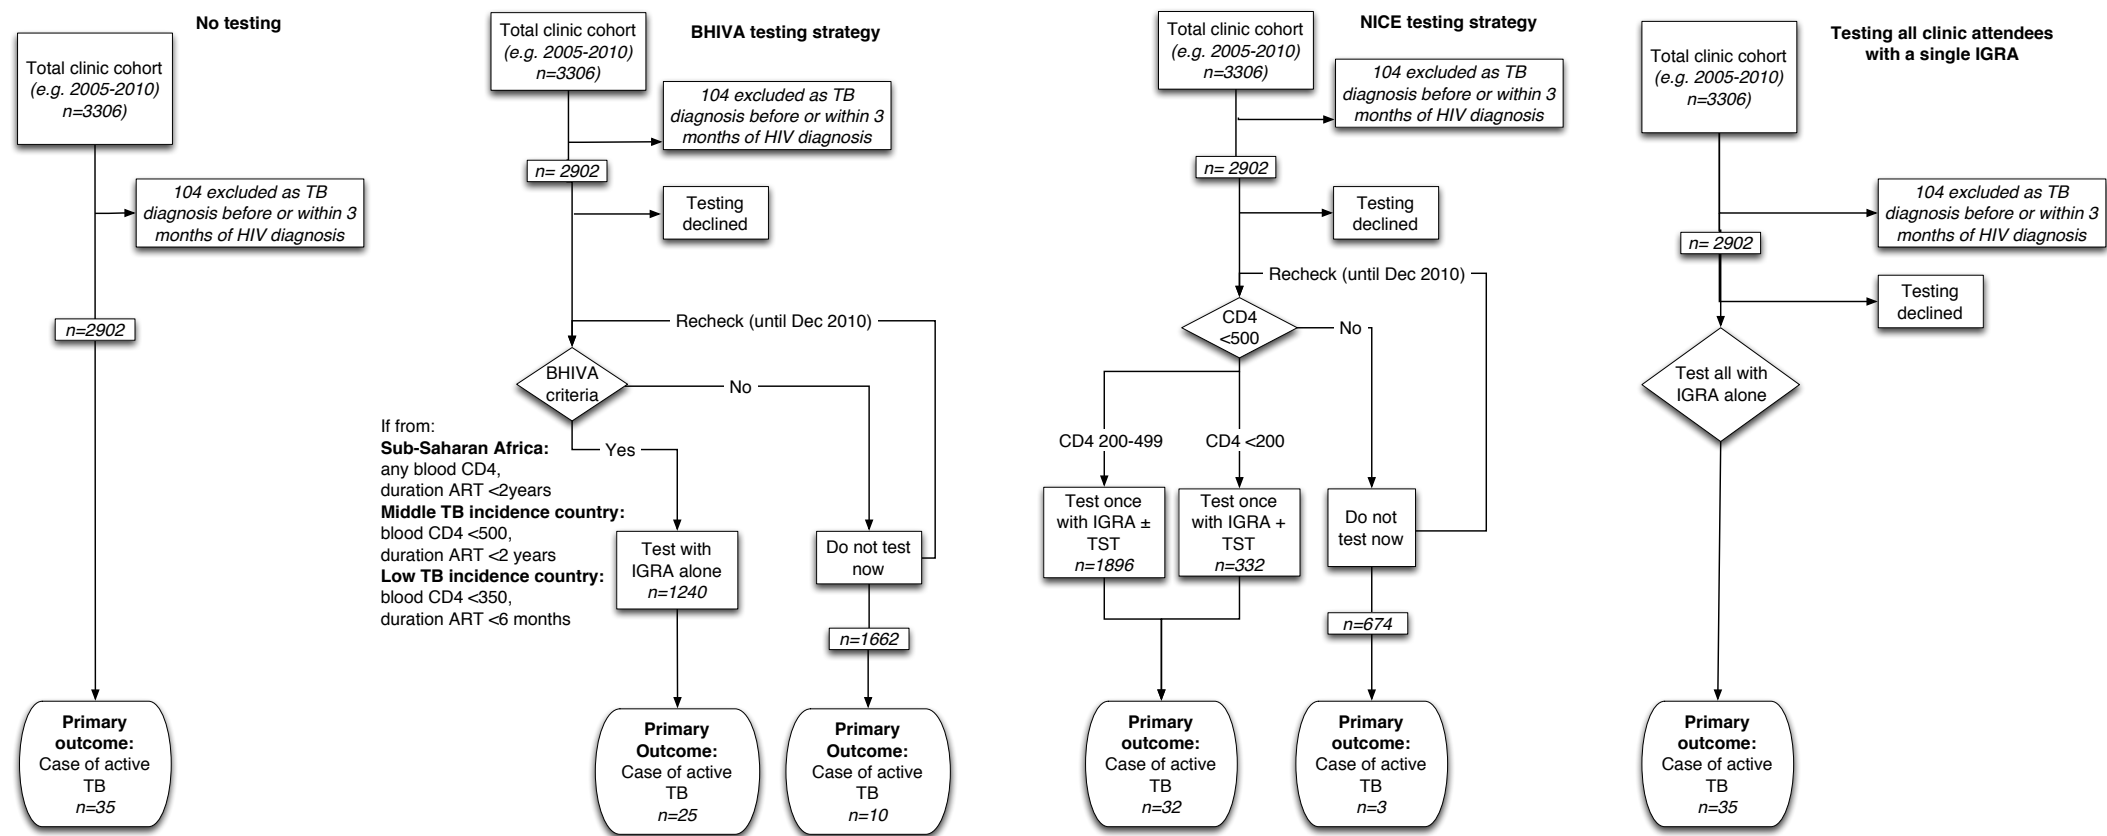

Note: ART – Antiretroviral therapy, BHIVA – British HIV Association, CD4 – blood CD4 cell count (cells/ $\mu$ L), IGRA – interferon gamma release assay, NICE – National Institute for Health and Care Excellence, TST – tuberculin skin test. Numbers marked in italics represent the number of subjects at each stage using hospital cohort data between 2005-2010.
